# Supplementary material for: The Small RNA AmiL Regulates Quorum Sensing-Mediated Virulence in Pseudomonas aeruginosa PAO1
Source: PubMed Central journal article supplement (PMC9045362; doi:10.1128/spectrum.02211-21), 2022-03-09
Supplement: spectrum02211-21_supp_1_seq11.pdf [file spectrum02211-21_supp_1_seq11.pdf]

**TABLE S1** Selected sRNAs with differential CPM in QS activation and QS gene-deficient conditions by RNA-Seq

| Locus tag       | Name        | CPM (counts per million) |              |              |                   |                   |
|-----------------|-------------|--------------------------|--------------|--------------|-------------------|-------------------|
|                 |             | PAO1 2 h                 | PAO1 4 h     | PAO1 6 h     | $\Delta lasI$ 6 h | $\Delta rhII$ 6 h |
| PA0836.1        | P5          | 125.74                   | 99.49        | 267.86       | 244.91            | 311.17            |
| PA1112.1        |             | 41.51                    | 59.06        | 70.23        | 83.99             | 87.16             |
| PA0887.1        | P7          | 24.39                    | 51.67        | 52.60        | 52.85             | 49.33             |
| PA2942.1        | P15         | 23.83                    | 14.15        | 10.82        | 19.79             | 20.64             |
| PA2958.1        | RgsA        | 147.93                   | 240.68       | 190.79       | 190.04            | 163.95            |
| PA3304.1        | P18         | 21.08                    | 21.04        | 33.07        | 25.73             | 29.27             |
| <b>PA3366.1</b> | <b>AmiL</b> | <b>46.32</b>             | <b>27.33</b> | <b>44.02</b> | <b>149.76</b>     | <b>103.07</b>     |
| PA3621.1        | RsmZ        | 24.59                    | 18.84        | 19.23        | 22.07             | 22.72             |
| PA4406.1        |             | 856.69                   | 1150.08      | 934.80       | 1050.25           | 1075.37           |
| PA4421.1        | RnpB        | 87324.48                 | 148798.32    | 194601.64    | 221663.35         | 185747.71         |
| PA4451.1        | P35         | 32.43                    | 25.31        | 18.41        | 20.68             | 24.55             |
| PA4704.1        | PrrF1       | 38.36                    | 78.48        | 73.60        | 78.02             | 79.74             |
| PA4704.2        | PrrF2       | 7.60                     | 11.59        | 11.53        | 14.98             | 12.22             |
| PA4758.1        | P32         | 66.47                    | 58.64        | 83.67        | 62.43             | 70.44             |
| PA5227.1        | SsrS        | 446.48                   | 347.28       | 603.42       | 758.26            | 870.71            |

The calculation of Unigene expression uses a normalization method, CPM, counts of exon model per million mapped reads.

**TABLE S2** Selected sRNAs with differential expression in QS activation condition by RNA-Seq

| Locus tag       | Name        | PAO1 2 h vs. 4 h |                               | PAO1 2 h vs. 6 h |                 | PAO1 4 h vs. 6 h |                             |
|-----------------|-------------|------------------|-------------------------------|------------------|-----------------|------------------|-----------------------------|
|                 |             | logFC            | <i>P</i>                      | logFC            | <i>P</i>        | logFC            | <i>P</i>                    |
| PA0836.1        | P5          | 0.60             | 6.06E-03                      | -0.76            | 9.62E-06        | -1.38            | 5.55E-09                    |
| PA1112.1        |             | -0.24            | 9.93E-02                      | -0.43            | 7.16E-04        | -0.21            | 1.23E-01                    |
| PA0887.1        | P7          | -0.81            | 6.48E-03                      | -0.78            | 3.19E-06        | 0.01             | 9.75E-01                    |
| PA2942.1        | P15         | 0.99             | 9.07E-04                      | 1.45             | 5.76E-08        | 0.44             | 3.49E-02                    |
| PA2958.1        | RgsA        | -0.43            | 3.84E-02                      | -0.03            | 7.92E-01        | 0.37             | 5.29E-02                    |
| PA3304.1        | P18         | 0.27             | 2.54E-01                      | -0.33            | 8.29E-02        | -0.62            | 5.37E-04                    |
| <b>PA3366.1</b> | <b>AmiL</b> | <b>1.02</b>      | <b>2.79E-05<sup>***</sup></b> | <b>0.41</b>      | <b>1.47E-01</b> | <b>-0.64</b>     | <b>1.58E-02<sup>*</sup></b> |
| PA3621.1        | RsmZ        | 0.65             | 8.21E-03                      | 0.67             | 2.40E-03        | 0.00             | 1.00E+00                    |
| PA4406.1        |             | -0.15            | 3.64E-01                      | 0.21             | 1.56E-01        | 0.34             | 4.53E-02                    |
| PA4421.1        | RnpB        | -0.50            | 1.55E-02                      | -0.82            | 6.70E-05        | -0.34            | 1.38E-01                    |
| PA4451.1        | P35         | 0.62             | 5.49E-03                      | 1.14             | 8.42E-08        | 0.50             | 2.25E-02                    |
| PA4704.1        | PrrF1       | -0.74            | 1.97E-02                      | -0.59            | 4.00E-03        | 0.12             | 6.36E-01                    |
| PA4704.2        | PrrF2       | -0.35            | 1.25E-01                      | -0.27            | 1.98E-01        | 0.05             | 7.98E-01                    |
| PA4758.1        | P32         | 0.46             | 1.55E-02                      | 0.00             | 1.00E+00        | -0.48            | 9.95E-03                    |
| PA5227.1        | SsrS        | 0.63             | 7.43E-04                      | -0.11            | 6.92E-01        | -0.76            | 1.27E-02                    |

logFC, log<sub>2</sub> (Fold Change); *P* value, \*, *P* < 0.05; \*\*\*, *P* < 0.001.

**TABLE S3** Selected sRNAs with differential expression in QS gene-deficient condition by RNA-Seq

| Locus tag       | Name        | PAO1 6 h vs. $\Delta lasI$ 6 h |                               | PAO1 6 h vs. $\Delta rhII$ 6 h |                             |
|-----------------|-------------|--------------------------------|-------------------------------|--------------------------------|-----------------------------|
|                 |             | logFC                          | P                             | logFC                          | P                           |
| PA0836.1        | P5          | 0.10                           | 6.65E-01                      | -0.20                          | 3.98E-01                    |
| PA1112.1        |             | -0.28                          | 5.95E-02                      | -0.29                          | 7.79E-02                    |
| PA0887.1        | P7          | -0.02                          | 9.00E-01                      | 0.11                           | 4.97E-01                    |
| PA2942.1        | P15         | -0.91                          | 2.36E-02                      | -0.92                          | 4.10E-02                    |
| PA2958.1        | RgsA        | -0.02                          | 9.19E-01                      | 0.24                           | 9.46E-02                    |
| PA3304.1        | P18         | 0.35                           | 6.10E-02                      | 0.20                           | 2.97E-01                    |
| <b>PA3366.1</b> | <b>AmiL</b> | <b>-1.80</b>                   | <b>1.69E-04<sup>***</sup></b> | <b>-1.22</b>                   | <b>2.67E-02<sup>*</sup></b> |
| PA3621.1        | RsmZ        | -0.23                          | 3.83E-01                      | -0.21                          | 3.47E-01                    |
| PA4406.1        |             | -0.19                          | 2.15E-01                      | -0.18                          | 3.24E-01                    |
| PA4421.1        | RnpB        | -0.22                          | 3.02E-01                      | 0.09                           | 5.65E-01                    |
| PA4451.1        | P35         | -0.22                          | 4.21E-01                      | -0.38                          | 1.65E-01                    |
| PA4704.1        | PrrF1       | -0.11                          | 5.12E-01                      | -0.09                          | 4.95E-01                    |
| PA4704.2        | PrrF2       | -0.39                          | 1.22E-01                      | -0.07                          | 7.66E-01                    |
| PA4758.1        | P32         | 0.41                           | 1.55E-02                      | 0.27                           | 1.02E-01                    |
| PA5227.1        | SsrS        | -0.35                          | 2.19E-01                      | -0.51                          | 9.92E-02                    |

logFC, log<sub>2</sub> (Fold Change); P value, \*,  $P < 0.05$ ; \*\*\*,  $P < 0.001$ .

**TABLE S4** The *amiEBCRS* operon genes with differential CPM in QS activation and QS gene-deficient conditions by RNA-Seq

| Locus tag | Name | CPM (counts per million) |          |          |                   |                   |
|-----------|------|--------------------------|----------|----------|-------------------|-------------------|
|           |      | PAO1 2 h                 | PAO1 4 h | PAO1 6 h | $\Delta lasI$ 6 h | $\Delta rhII$ 6 h |
| PA3366    | amiE | 62.99                    | 92.35    | 202.86   | 572.41            | 367.28            |
| PA4947    | amiB | 193.54                   | 227.36   | 229.25   | 245.98            | 257.83            |
| PA3364    | amiC | 13.69                    | 43.24    | 118.04   | 323.92            | 182.47            |
| PA3363    | amiR | 13.84                    | 41.00    | 122.15   | 336.01            | 188.34            |
| PA3362    | amiS | 9.37                     | 16.11    | 67.50    | 95.99             | 67.14             |

The calculation of Unigene expression uses a normalization method, CPM, counts of exon model per million mapped reads.

**TABLE S5** Bacterial strains and plasmids

| Strains / Plasmids             | Characteristics                                                                                                          | Source                           |
|--------------------------------|--------------------------------------------------------------------------------------------------------------------------|----------------------------------|
| <b><i>Pseudomonas</i></b>      |                                                                                                                          |                                  |
| PAO1                           | Wild-type strain, Gm <sup>S</sup> , Amp <sup>R</sup>                                                                     | Our lab                          |
| PAO1 $\Delta lasI$             | Deficiency of <i>lasI</i> , Gm <sup>S</sup> , Amp <sup>R</sup>                                                           | Our lab <sup>(1)</sup>           |
| PAO1 $\Delta rhII$             | Deficiency of <i>rhII</i> , Gm <sup>S</sup> , Amp <sup>R</sup>                                                           | Our lab <sup>(1)</sup>           |
| PAO1 $\Delta AmiL$             | Deficiency of <i>amiL</i> , Gm <sup>S</sup> , Amp <sup>R</sup>                                                           | This work                        |
| <b><i>Escherichia coli</i></b> |                                                                                                                          |                                  |
| DH5 $\alpha$                   | Wild-type strain, Gm <sup>S</sup> , Amp <sup>S</sup>                                                                     | Our lab                          |
| SM10 $\lambda$ PT              | Wild-type strain, Gm <sup>S</sup> , Amp <sup>S</sup>                                                                     | Our lab                          |
| <b>Plasmids</b>                |                                                                                                                          |                                  |
| pGSM                           | Homologous recombinant plasmid, Gm <sup>R</sup> , Amp <sup>R</sup>                                                       | Our lab <sup>(1)</sup>           |
| pROp200 (EV)                   | Control plasmid based on pBBR1 MCS-5, Gm <sup>R</sup>                                                                    | Prof. Shiyun Chen <sup>(2)</sup> |
| pROp200-LasR <sup>+</sup>      | PAO1 <i>lasR</i> overexpression plasmid, controlled by P <sub>lac</sub> promoter, Gm <sup>R</sup>                        | Our lab <sup>(3)</sup>           |
| pROp200-RhIR <sup>+</sup>      | PAO1 <i>rhIR</i> overexpression plasmid, controlled by P <sub>lac</sub> promoter, Gm <sup>R</sup>                        | Our lab <sup>(3)</sup>           |
| pROp200-AmiL <sup>+</sup>      | PAO1 <i>amiL</i> overexpression plasmid, controlled by P <sub>lac</sub> promoter, Gm <sup>R</sup>                        | This work                        |
| pSTV28 (EV <sup>+</sup> )      | Control plasmid, containing P <sub>lac</sub> promoter, Cm <sup>R</sup>                                                   | Our lab                          |
| pSTV28-AmiL <sup>+</sup>       | PAO1 <i>amiL</i> overexpression plasmid, controlled by P <sub>lac</sub> promoter, Cm <sup>R</sup>                        | This work                        |
| pUCP30T- <i>gfp</i>            | Control plasmid, <i>gfp</i> controlled by P <sub>lac</sub> promoter, Gm <sup>R</sup>                                     | Our lab <sup>(3)</sup>           |
| pUCP30T- <i>lasI-gfp</i>       | Containing transcription fusion of <i>lasI-gfp</i> , which controlled by P <sub>lac</sub> promoter, Gm <sup>R</sup>      | This work                        |
| pUCP30T- <i>rhIR-gfp</i>       | Containing transcription fusion of <i>rhIR-gfp</i> , which controlled by P <sub>lac</sub> promoter, Gm <sup>R</sup>      | This work                        |
| pUCP30T- <i>phzC-gfp</i>       | Containing transcription fusion of <i>phzC-gfp</i> , which controlled by P <sub>lac</sub> promoter, Gm <sup>R</sup>      | This work                        |
| pUCP30T-mut- <i>phzC-gfp</i>   | Containing transcription fusion of mut- <i>phzC-gfp</i> , which controlled by P <sub>lac</sub> promoter, Gm <sup>R</sup> | This work                        |

Gm, Amp and Cm stand for gentamicin, ampicillin and chloramphenicol, respectively. S, sensitive; R, resistant.

**TABLE S6** Sequences of cloning primers and qRT-PCR primers

| Name                    | Purpose              | Sequence (5'→3')                          |
|-------------------------|----------------------|-------------------------------------------|
| <b>Cloning primers</b>  |                      |                                           |
| AmiL-P1                 | ΔAmiL                | ACGGCCAGTGAATTCGAGCTCAAAGCGCCAGTTTGTAGCAG |
| AmiL-P2                 | ΔAmiL                | CATGGATATCACCTCCTTATAAGCCCCGTCGGAAG       |
| AmiL-P3                 | ΔAmiL                | GACGGGGCTTATAAGGAGGTGATATCCATGCGTCA       |
| AmiL-P4                 | ΔAmiL                | GGCTGGATCCCAAGCTCTAGATCCTTCTCCAGTCCCTCGTA |
| AmiL-over-F             | AmiL <sup>+</sup>    | ATCGGCTCGTATAATGAATTCATCAGGTCGTGCGCATCA   |
| AmiL-over-R             | AmiL <sup>+</sup>    | CGAATTTTAAACAAAAGAATTCGGATATCACCTCTTGTGTT |
| In28-AmiL-F             | AmiL <sup>+</sup>    | TCCTCTAGAGTGCACCTGCAGCTTGCCCGAGCCTTGACAGC |
| In28-AmiL-R             | AmiL <sup>+</sup>    | ACGACGGCCAGTGCCAAGCTTTTGACCACCGCCACTCCGA  |
| 30T- <i>lasI</i> -F     | <i>lasI-gfp</i>      | GCTCTAGAATGAGCCGTTTCGCCATCA               |
| 30T- <i>lasI</i> -R     | <i>lasI-gfp</i>      | CATGCCATGGTGCCGATCTTCAGGTGC               |
| 30T- <i>rhII</i> -F     | <i>rhII-gfp</i>      | CGGAATTCATGCACGATTCCCTTCACC               |
| 30T- <i>rhII</i> -R     | <i>rhII-gfp</i>      | GCTCTAGAATGCTCCAGGTCGGTCA                 |
| 30T- <i>phzC</i> -F     | <i>phzC-gfp</i>      | GCTCTAGAATGCCACTTCCTGCATTCCCTC            |
| 30T- <i>phzC</i> -R     | <i>phzC-gfp</i>      | CATGCCATGGGATCGTCCATAGTTCTCCC             |
| 30T-mut- <i>phzC</i> -F | mut- <i>phzC-gfp</i> | ATTCCAAAGGGCGTCATCAAACGCGAAGGC            |
| 30T-mut- <i>phzC</i> -R | mut- <i>phzC-gfp</i> | TTGATGACGCCCTTTGGAATGCTCAGGGCG            |
| <b>qRT-PCR primers</b>  |                      |                                           |
| <i>rpoD</i> -F          | qRT-PCR              | CTGAAGATCGCCAAAGAGCC                      |
| <i>rpoD</i> -R          | qRT-PCR              | GTGTGGTCCGGTGTTCATGTC                     |
| <i>amiL</i> -F          | qRT-PCR              | GCATCAGCGTCGATGT                          |
| <i>amiL</i> -R          | qRT-PCR              | AGCCCATTTGCTCTGT                          |
| <i>lasI</i> -F          | qRT-PCR              | CGTGCTCAAGTGTTCGAAGGA                     |
| <i>lasI</i> -R          | qRT-PCR              | AAAACCTGGGCTTCAGGAGT                      |
| <i>rhII</i> -F          | qRT-PCR              | CTACCGGCATCAGGTCTTCA                      |
| <i>rhII</i> -R          | qRT-PCR              | GTTTCGCTGCACAGGTAGG                       |

**References:**

1. Zeng J, Zhang N, Huang B, Cai R, Wu B, E S, Fang C, Chen C. 2016. Mechanism of azithromycin inhibition of HSL synthesis in *Pseudomonas aeruginosa*. *Sci Rep* 6:24299. [https://doi: 10.1038/srep24299](https://doi.org/10.1038/srep24299).
2. Lu P, Wang Y, Zhang Y, Hu Y, Thompson KM, Chen S. 2016. RpoS-dependent sRNA RgsA regulates Fis and AcpP in *Pseudomonas aeruginosa*. *Mol Microbiol* 102:244-259. [https://doi: 10.1111/mmi.13458](https://doi.org/10.1111/mmi.13458).
3. Lu Y, Li H, Pu J, Xiao Q, Zhao C, Cai Y, Liu Y, Wang L, Li Y, Huang B, Zeng J, Chen C. 2019. Identification of a novel RhII/R-PrrH-LasI/PhzC/PhzD signalling cascade and its implication in *P. aeruginosa* virulence. *Emerg Microbes Infect* 8:1658-1667. [https://doi: 10.1080/22221751.2019.1687262](https://doi.org/10.1080/22221751.2019.1687262).
